# Supplementary material for: Retinal VEGF-A Overexpression Is Not Sufficient to Induce Lymphangiogenesis Regardless of VEGF-C Upregulation and Lyve1+ Macrophage Infiltration
Source: PubMed Central journal article supplement — Invest Ophthalmol Vis Sci. 2021 Oct 21;62(13):17. doi: 10.1167/iovs.62.13.17 (PMC8543389; doi:10.1167/iovs.62.13.17), 2021-10-21
Supplement: iovs-62-13-17_s002.pdf [file iovs-62-13-17_s002.pdf]

Supplementary Table 1. Primer Sequences Used for Real-Time RT-PCR

| Target gene          | Assay ID   |
|----------------------|------------|
| <i>Lyve1</i>         | Mm00475056 |
| <i>Pdpn</i>          | Mm00494716 |
| <i>Prox1</i>         | Mm00435969 |
| <i>Vegfa</i>         | Mm00437306 |
| <i>Vegfc</i>         | Mm11437310 |
| <i>Figf</i> (Vegfd)  | Mm01131929 |
| <i>Kdr</i> (Vegfr2)  | Mm01222421 |
| <i>Flt4</i> (Vegfr3) | Mm01292608 |
| <i>Pecam1</i>        | Mm01242576 |
| <i>GAPDH</i>         | Mm99999915 |

*Lyve1*, lymphatic endothelial hyaluronan receptor-1; *Prox1*, prospero homeobox 1; *VEGF*, vascular endothelial growth factor; *GAPDH*, glyceraldehyde-3-phosphate dehydrogenase.
